# Supplementary figures and images for: Biochar Addition to a Mediterranean Agroecosystem: Short-Term Divergent Priming Effects
Source: MDPI journal article supplement (doi:10.3390/agriculture14020242), 2024-02-01

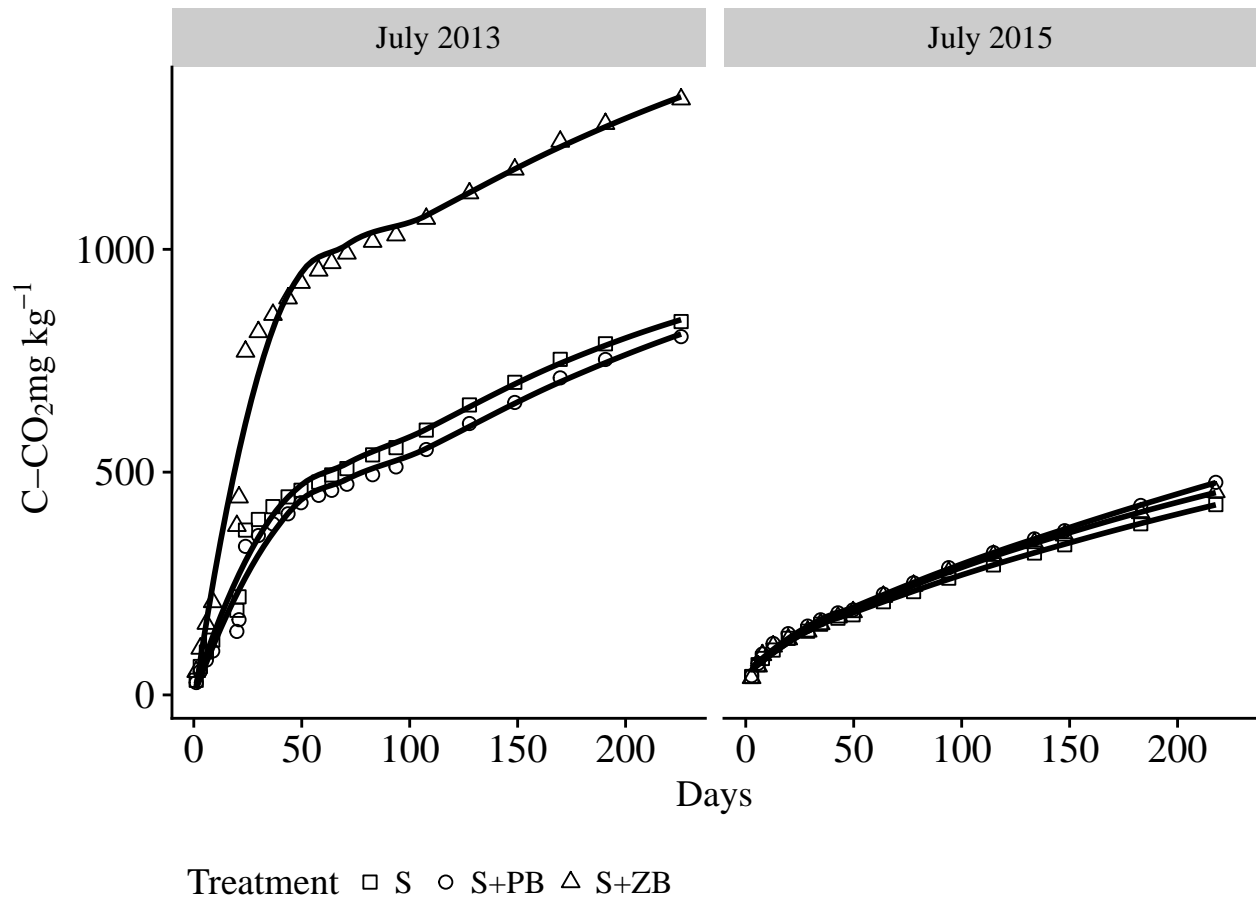

Supplement: s1 [file s1]
